# Supplementary material
Source: PubMed Central journal article supplement (PMC3634678)
Supplement: supp_tpc.113.110551_tpc110551Supplemental.pdf [file supp_tpc.113.110551_tpc110551Supplemental.pdf]

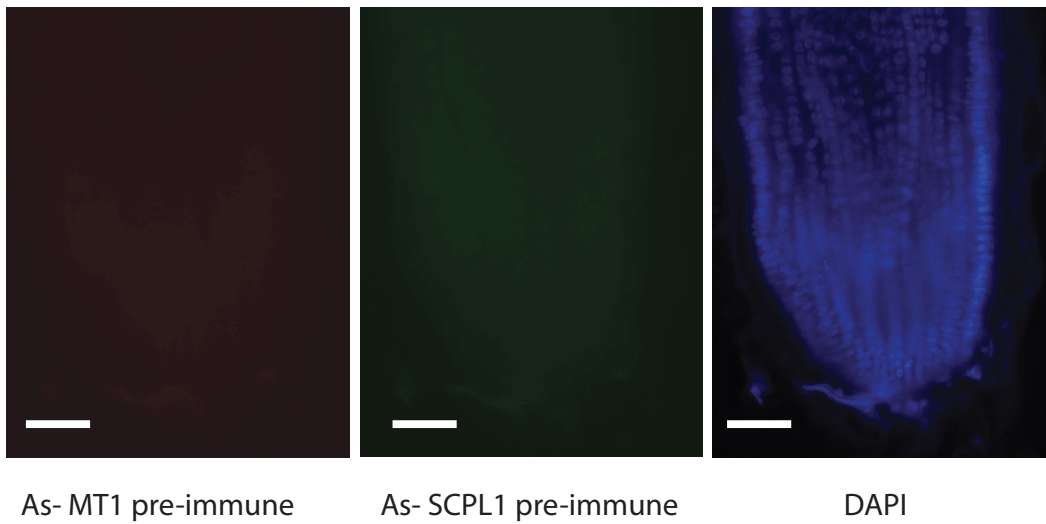

**Supplemental Figure 1.** Wild-type oat root sections probed with pre-immune sera corresponding to the immuno-localisation images shown in Figure 4 D. Scale bars indicate 100  $\mu\text{m}$ .

A

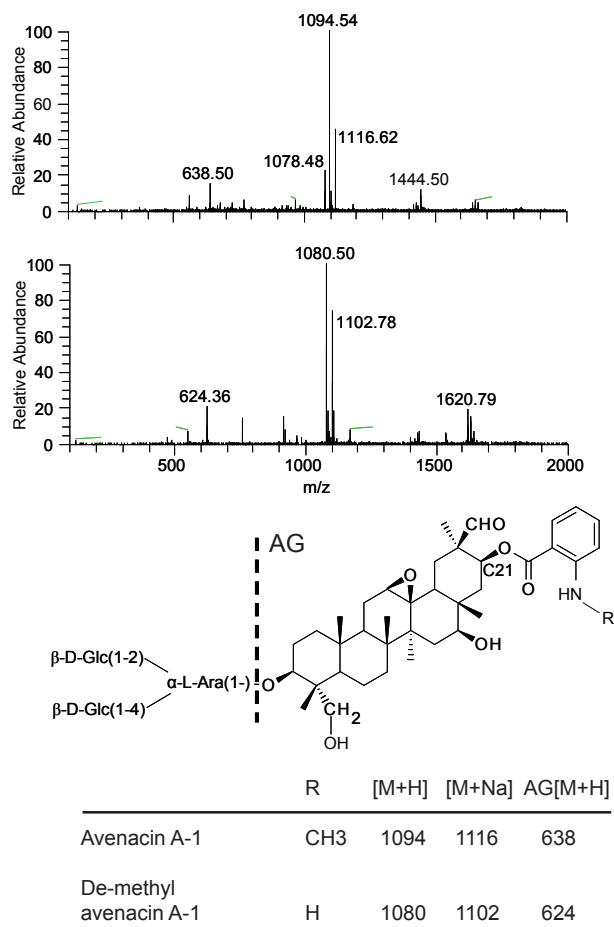

B

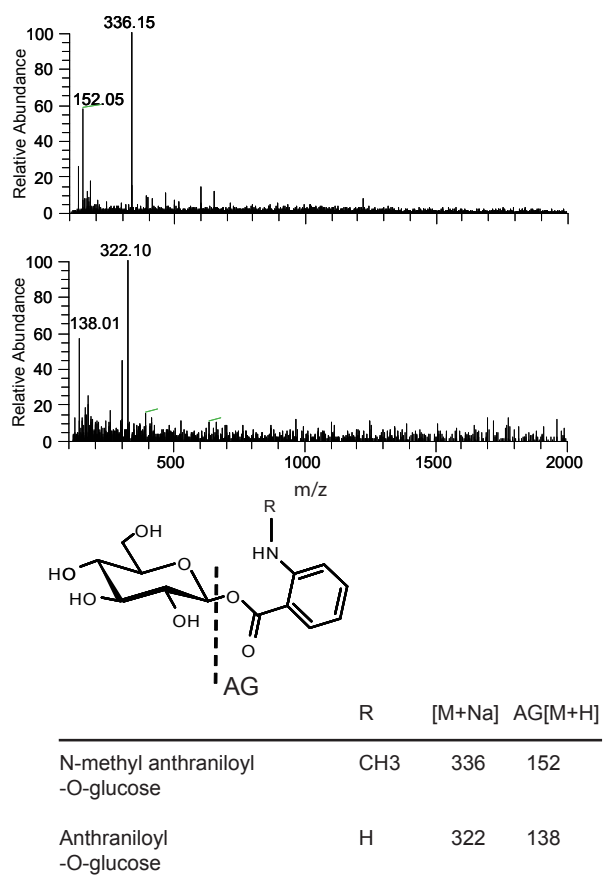

C

Supplemental Figure 2

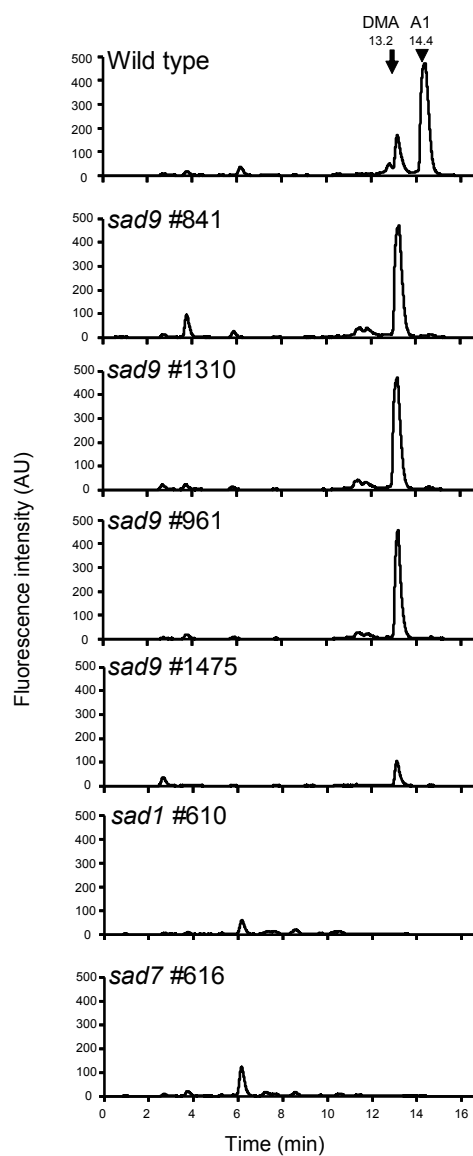

**Supplemental Figure 2. Identification of des-methyl avenacin A-1 and anthraniloyl-*O*-glucose by LCMS.**

(A) Mass spectra for avenacin A-1 (top, corresponding to the 14.4 min peak in the wild-type sample in Figure 4A), and des-methyl avenacin A-1 (bottom, corresponding to the 13.2 min peak in the *sad9* mutant #1310). Avenacin A-1 gives rise to major ions at  $m/z = 1094$  and  $1116$ , the proton and sodium adducts. Corresponding ions 14 amu lighter (loss of  $\text{CH}_3$ ) are seen in the *sad9* mutant at  $m/z = 1080$  and  $1102$ . In-chamber fragmentation gives rise to the aglycone (AG) of avenacin A-1 at  $m/z = 638$ , and of des-methyl avenacin A-1 at  $624$ , showing that the methyl group is missing from the aglycone and not the trisaccharide. The fluorescence emission maxima of the methanolic root extracts from wild type was found to be  $440\text{ nm}$  compared to  $410\text{ nm}$  from the *sad9* mutant. This is consistent with the fluorescence spectra of *N*-methyl anthranilate and anthranilate, respectively, and suggests that the methyl group is likely to be missing from the anthranilate acyl-group in the *sad9* mutants.

(B) Mass spectra for *N*-methyl anthraniloyl-*O*-glucose (NMA-glc; corresponding to the 6.2 min peak in the *sad7* mutant sample in Figure 4) and anthraniloyl-*O*-glucose (Anth-glc; corresponding to the 2.7 min peak in the *sad 9* mutant sample #1310 in Figure 4). NMA-glc gives rise to a major ion at  $m/z = 336$  corresponding to the sodium adduct; and at  $152$ , the proton adduct of the aglycone. Anth-glc produces corresponding ions 14 amu lighter than these at  $322$  and  $138$ , indicating that a methyl group is missing from the aglycone.

(C) LC analysis with fluorescence detection of root-tip extracts shows the absence of avenacin A-1 (A1 indicated by the arrow head) and the presence of des-methyl avenacin A (DMA, indicated by arrow) in all *sad9* mutants. The *sad1* (#610) and *sad7* (#616) mutants lack both compounds.

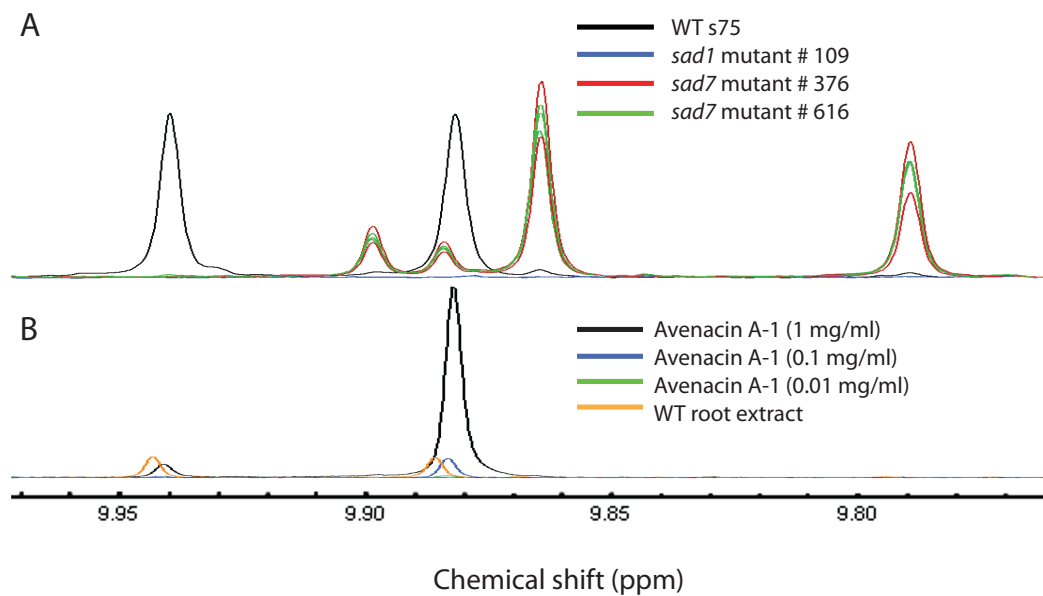

**Supplemental Figure 3. <sup>1</sup>H-NMR spectra of the avenacin C30-aldehyde region in oat root extracts.**

(A) Analysis of extracts of wild type (WT) and mutant oat roots. WT extracts show characteristic peaks at 9.88 and 9.94 ppm corresponding to the C-30 aldehyde of avenacins A-1 and A-2 respectively. The peaks present in the *sad7* mutants at 9.79 and 9.86 correspond to des-acyl avenacins. None of these peaks were detected in the avenacin-deficient *sad1* mutant. Spectra for several representative samples are shown for *sad7* mutants #616 and #376. (B) Avenacin A-1 standards with WT oat root extract for comparison. The avenacin A-1 standard has a low level of avenacin A-2 contamination. Oat roots were harvested from 2-week-old hydroponically grown plants, and were extracted in 70% deuterated methanol in D<sub>2</sub>O (containing 51.6 μg/ml TSP as an internal standard), and spectra were collected using a 600MHz NMR spectrometer (Bruker). Total avenacin and des-acyl avenacin concentrations, pMols/mg fresh weight (± SEM, n=4): wild type, 6.11 ±0.41; *sad7* mutant #376: 8.54 ±1.08; *sad7*mutant #616: 7.16 ±0.89. Note that these values are based on extracts from whole root systems, in contrast to the values reported in the main text which are based on extracts from root tips.

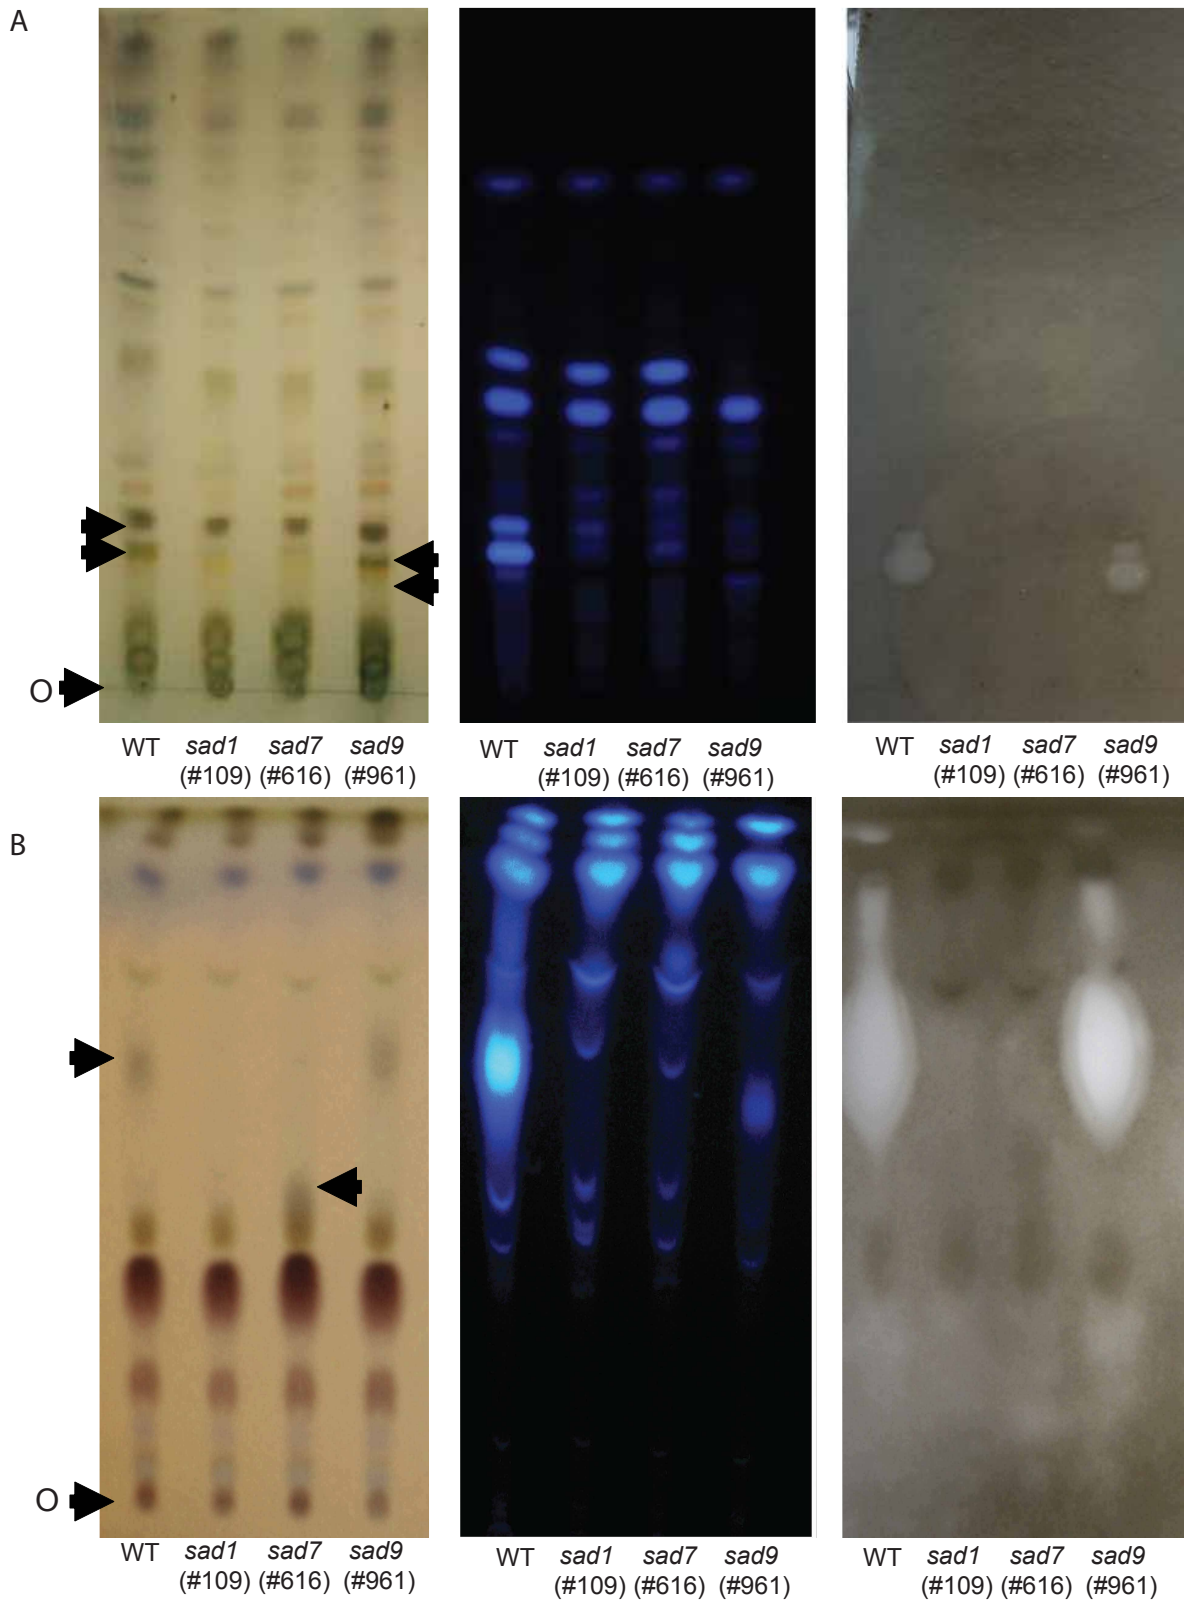

**Supplemental Figure 4. Anti-fungal activity is associated the des-methyl avenacin A-1 in the *sad9* root extract, but not with des-acyl avenacin A in *sad7* root extract.**

Extracts from equal weights of root tips from wild type or avenacin-deficient *sad1* (#109), *sad7* (#616), or *sad9* (#961) mutants were separated by thin layer chromatography, and visualised by *p*-anisaldehyde staining (left), UV-illumination (centre) or with a bioassay for the growth of *Colletotrichum orbiculare* (#NBRC 33130) (right). Samples were scraped from a replicate TLC plate in the areas indicated by arrows, and identified by mass spectrometry.

A: TLC was developed in chloroform:methanol:water at a ratio of 13:6:1. The two major fluorescent avenacins (A-1 and B-1) were detected in the WT samples indicated by the lower and upper arrows respectively, the non-fluorescent avenacin A-2 was also present at the same retention factor (Rf) as avenacin A-1. These are associated with two distinct zones of inhibition of *Colletotrichum* growth. These zones of inhibition are absent from *sad1* and *sad7* mutants that lack acylated avenacins, but present in the *sad9* mutant, where they are associated with the two detectable avenacins: des-methyl avenacin A (which has weak purple fluorescence) and avenacin A-2 (not fluorescent but associated with *p*-anisaldehyde stain (Avenacin B-2 is also present in *sad9* mutant roots, but at much lower levels (Supplemental Table 1)). This indicates that, as with other acylated avenacins, desmethyl avenacin A-1 possesses anti-fungal activity.

B: TLC was developed in chloroform:methanol:water at a ratio of 10:9:1. A similar zone of inhibition can be seen associated with the presence of acylated avenacins in the WT and *sad9* mutant (top arrow). The presence of desacyl avenacin A can be seen by *p*-anisaldehyde staining and no anti-fungal activity is associated with this compound, despite it's presence at similar levels to the acylated avenacins in the WT. O = origin. For staining; one replicate plate was sprayed with acetic acid:*p*-anisaldehyde:sulphuric acid (480:1:1), and heated at 130° C for 10 minutes. Growth assay for *Colletotrichum orbiculare* was performed as described in Tsurushima et al. (1995).

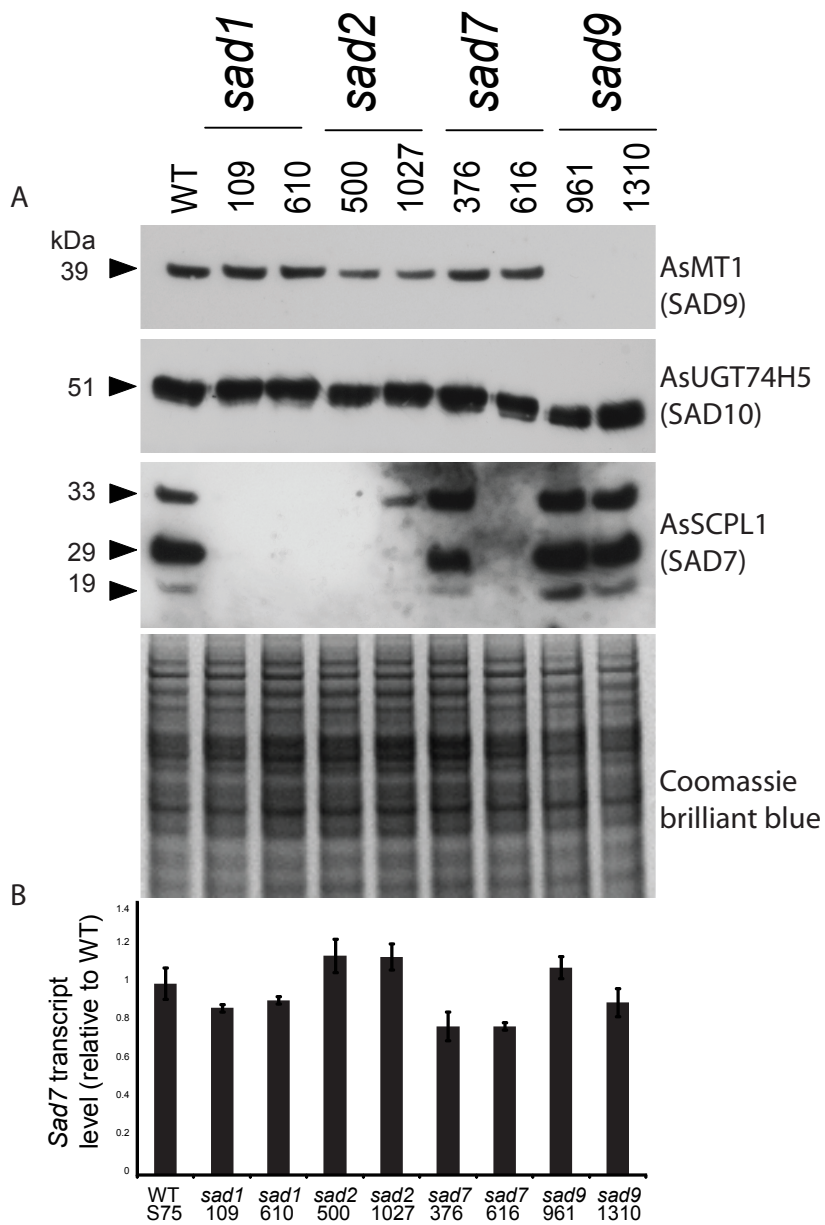

**Supplemental Figure 5. As- SCPL1 expression is reduced or abolished in oat mutants blocked in the early steps in the synthesis of the avenacin triterpene.**

(A) Immuno-blot analysis of soluble protein extracts from oat roots, probed with specific antisera raised against As- MT1, As- UGT74H5 and As- SCPL1. The bottom panel shows Coomassie brilliant blue-staining of a replicate gel. Protein extracts from root tips of 3-day-old seedlings were prepared from wild-type *Avena strigosa*, and *sad1* (#109 and #610), *sad2* (#500 and #1027), *sad7* (#376 and #616), and *sad9* (#961 and #1310) mutants. Bands corresponding to the predicted size of the MT1 and UGT74H5 proteins, and the predicted subunits of the mature SCPL1 protein (Mugford et al. 2009) were detected. (B) Analysis of *SCPL1* transcript levels in RNA extracted from 3-day-old root tips, measured by qPCR. RNA was extracted and cDNA synthesised as described previously (Qi et al. 2006). Expression values were normalised against the *Efla* transcript. Values are means (n=3, ±S.E.M). No significant differences were found between the wild type and any of the mutants ( $p > 0.05$ , T-test with Bonferroni correction).



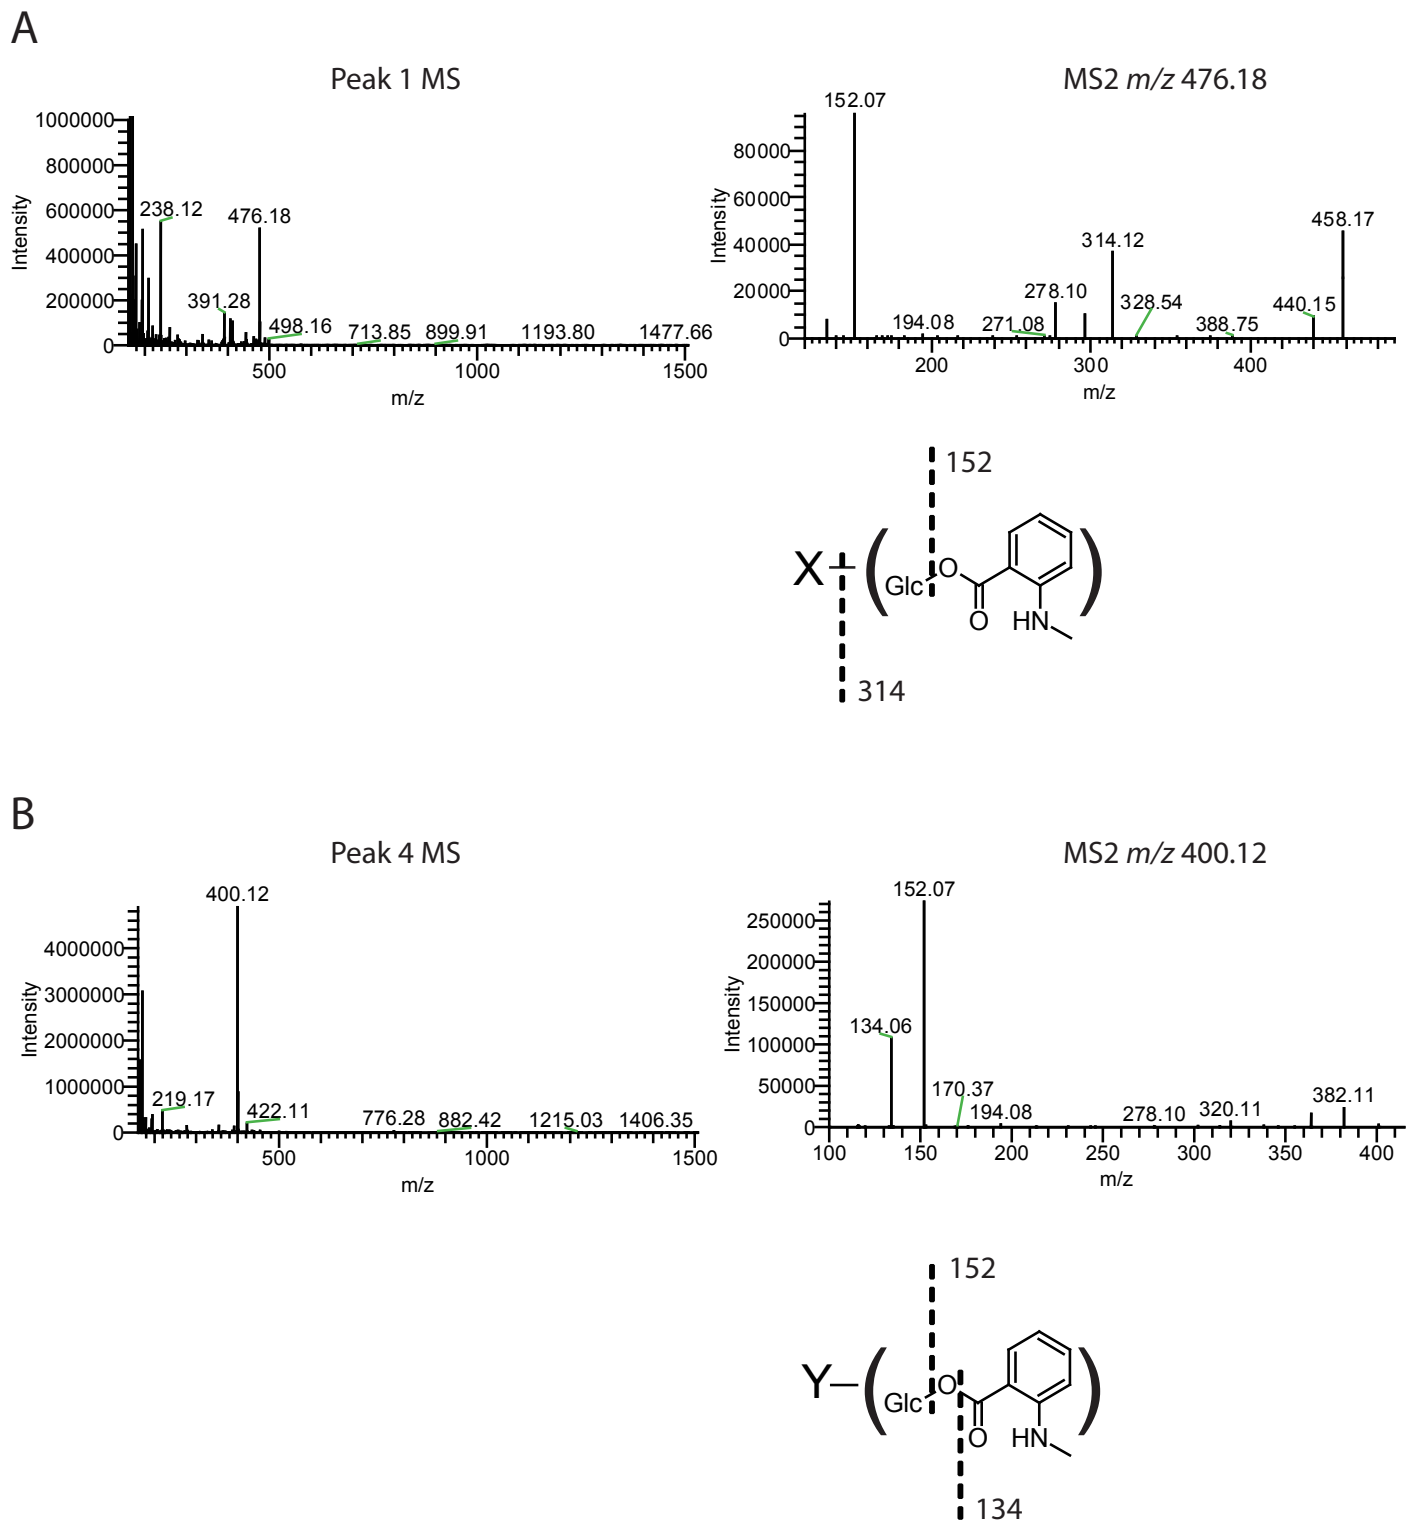

**Supplemental Figure 6. LCMS analysis of fluorescent compounds from *N.******benthamiana* plants co-expressing As- MT1 and As- UGT74H5.**

Mass spectra (left) and MS2 fragmentation (right) of peak 1 (A) and peak 4 (B) from figure 4, together with a schematic showing the likely fragmentation events. The accurate mass of the compound in peak 1 = 476.1767 amu, which is consistent with  $C_{20}H_{29}O_{12}N$  [M+H] (error = 0.84 ppm) or *N*-methyl anthraniloyl-*O*-glucose + a hexose (X). The mass of the compound in peak 4 is 400.1238, consistent with  $C_{17}H_{21}O_{10}N$  [M+H] (error = 0.006 ppm) or *N*-methyl anthraniloyl-*O*-glucose + malate (Y).

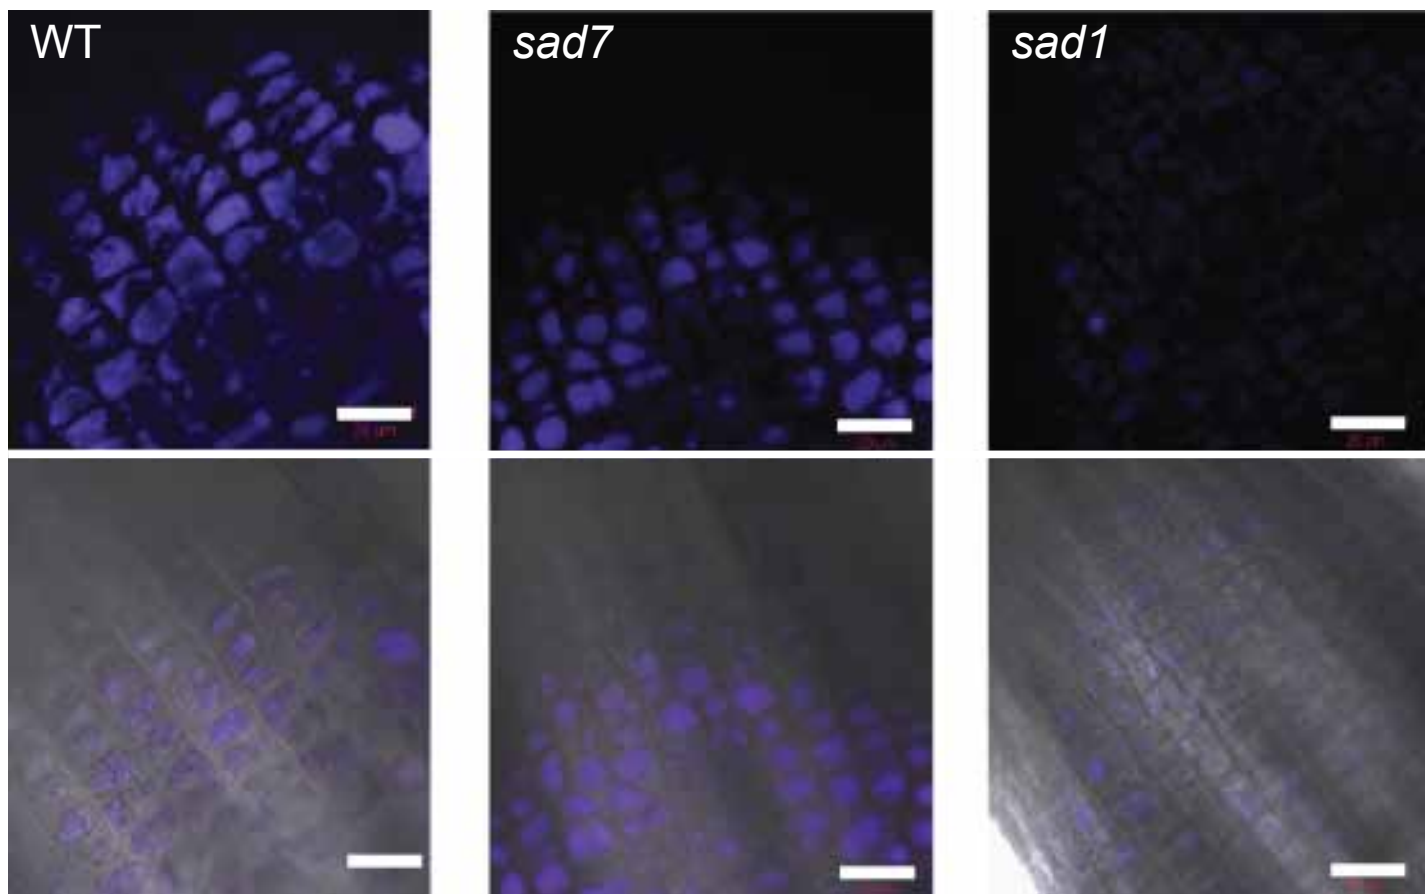

**Supplemental Figure 7. Fluorescent compounds accumulate in the vacuole of the *sad7* mutants.**

Optical sections of epidermal cells of root tips of 3-day-old seedlings of wild-type *A. strigosa* (WT), *sad7* mutant #616, and *sad1* mutant #610. Top, UV-fluorescence confocal microscopy; bottom, UV-fluorescence confocal microscopy overlaid with the bright field image. The same image acquisition and processing settings were used for the three images. Scale bars indicate 20 μm.

**Supplemental Table 1. Quantification of avenacins and des-methyl avenacin A-1 in wild type and mutant oat root tips.**

|               | Root tip avenacin concentrations (pMols per mg fresh weight) |              |              |              |                         |
|---------------|--------------------------------------------------------------|--------------|--------------|--------------|-------------------------|
|               | Avenacin A-1                                                 | Avenacin B-1 | Avenacin A-2 | Avenacin B-2 | Des-methyl avenacin A-1 |
| WT            | 365.3 ±8.9                                                   | 71.2 ±6.0    | 60.4 ±3.6    | 27.4 ±21.8   | 37.3 ±2.4               |
| sad9<br>#961  | n/d                                                          | n/d          | 65.0 ±17.5   | 13.6 ±2.5    | 109.0 ±29.9             |
| sad9<br>#1310 | n/d                                                          | n/d          | 114.5 ±7.8   | 13.6 ±1.3    | 189.2 ±26.5             |
| sad1<br>#109  | n/d                                                          | n/d          | n/d          | n/d          | n/d                     |
| sad1<br>#610  | n/d                                                          | n/d          | n/d          | n/d          | n/d                     |
| sad7<br>#376  | n/d                                                          | n/d          | n/d          | n/d          | n/d                     |
| sad7<br>#616  | n/d                                                          | n/d          | n/d          | n/d          | n/d                     |

Values are means ( $\pm$  SEM) of four biological replicates. Samples were analysed by high-pressure liquid chromatography (HPLC) coupled with mass spectrometry as described in Mugford et al. (2009). Avenacins A-1 and B-1 were quantified by fluorescence detection, and compared to a standard curve of N-methyl anthranilate; Des-methyl avenacin was quantified using a standard curve of anthranilate, and Avenacins A-2 and B-2 were quantified by UV-absorbance at 230 nm, and compared to a standard curve of benzoate. Values reported as n/d were below the detection limit, which was  $< 1$  pMol/mg for all compounds.

**Supplemental Table 2.** Quantification of fluorescent compounds in *N. benthamiana*

leaves co-expressing avenacin biosynthetic enzymes.

| Peak:                   | Concentration in nmols of compound per mg leaf (dry weight) ± SEM |       |         |       |      |       |             |        |
|-------------------------|-------------------------------------------------------------------|-------|---------|-------|------|-------|-------------|--------|
|                         | 1                                                                 |       | 2       |       | 3    |       | 4           |        |
| Compound:               | NMA-glc-glc                                                       |       | NMA-glc |       | NMA  |       | NMA-glc-mal |        |
| AsMT1 + UGT74H5 + SCPL1 | 8.52                                                              | ±3.98 | 20.92   | ±4.85 | 3.52 | ±1.26 | 38.41       | ±14.16 |
| AsMT1 + UGT74H5         | 13.00                                                             | ±3.49 | 39.76   | ±6.46 | 7.34 | ±1.73 | 87.18       | ±18.04 |
| AsMT1 +SCPL1            | 4.48                                                              | ±2.67 | 4.73    | ±0.49 | 1.22 | ±0.63 | 11.61       | ±4.64  |
| AsMT1                   | 12.35                                                             | ±5.77 | 11.93   | ±3.22 | 2.16 | ±0.97 | 20.02       | ±8.95  |
| AsSCPL1                 | n/d                                                               |       | n/d     |       | n/d  |       | n/d         |        |
| UGT74H5                 | n/d                                                               |       | n/d     |       | n/d  |       | n/d         |        |
| UGT74H5+SCPL1           | n/d                                                               |       | n/d     |       | n/d  |       | n/d         |        |
| EV                      | n/d                                                               |       | n/d     |       | n/d  |       | n/d         |        |
| P19                     | n/d                                                               |       | n/d     |       | n/d  |       | n/d         |        |

Compounds were assayed for four replicate samples for each genotype by HPLC with fluorescence detection (Figure 4), and quantified using a standard curve of *N*-methyl anthranilate. NMA, *N*-methyl anthranilate; NMA-glc, *N*-methyl anthraniloyl-*O*-glucose; NMA-glc-glc and NMA-glc-mal, putative glucose- and malate- derivatives of *N*-methyl anthraniloyl-*O*-glucose, respectively. Values reported as n/d were below the detection limit, which was < 1 pMol/mg for all compounds.

**Supplementary Table 3.** Subcellular localisation of the AsMT1, AsUGT74H5 and AsSCPL1 proteins.

| Tissue                     | Genotype     | Antisera       | Density (particles per $\mu\text{m}^2$ )           |                                                    |                           |                          |                         |                          |                         |                         |            |                          |
|----------------------------|--------------|----------------|----------------------------------------------------|----------------------------------------------------|---------------------------|--------------------------|-------------------------|--------------------------|-------------------------|-------------------------|------------|--------------------------|
|                            |              |                | Compartment                                        |                                                    |                           |                          |                         |                          |                         |                         |            |                          |
|                            |              |                | Cyt                                                | Vac                                                | Mit                       | Pla                      | ER                      | Wall                     | Nuc                     | Gol                     | Oth        | Int                      |
|                            |              |                | <b>AsSCPL1 (SAD7)</b>                              |                                                    |                           |                          |                         |                          |                         |                         |            |                          |
| Oat root tip               | WT           | Anti-AsSCPL1   | 6.9<br>(21)<br>$\pm 0.5$                           | <b>38.6</b><br>(20)<br><b><math>\pm 4.2</math></b> | 2.6<br>(16)<br>$\pm 0.8$  | 6.1<br>(2)               | 5.8<br>(7)<br>$\pm 1.0$ | 1.5<br>(9)<br>$\pm 0.6$  | 2.0<br>(3)<br>$\pm 1.2$ | 4.9<br>(2)              | n/d        | n/d                      |
|                            |              | PI             | 4.5<br>(12)<br>$\pm 0.7$                           | 1.8<br>(8)<br>$\pm 0.5$                            | 10.6<br>(12)<br>$\pm 2.4$ | n/d                      | 3.7<br>(3)<br>$\pm 3.7$ | 6.3<br>(8)<br>$\pm 1.7$  | 6.2<br>(4)<br>$\pm 2.8$ | n/d                     | n/d        | n/d                      |
|                            | sad7         | Anti-AsSCPL1   | 2.2<br>(8)<br>$\pm 0.4$                            | 0.3<br>(14)<br>$\pm 0.2$                           | 2.0<br>(13)<br>$\pm 1.2$  | n/d                      | 5.8<br>(3)<br>$\pm 3.4$ | 0.0<br>(1)               | 3.6<br>(2)<br>$\pm 1.4$ | 5.1<br>(2)<br>$\pm 5.1$ | n/d        | n/d                      |
|                            |              |                | <b>AsMT1 (SAD9)</b>                                |                                                    |                           |                          |                         |                          |                         |                         |            |                          |
| Oat root tip               | WT           | Anti-AsMT1     | <b>7.9</b><br>(12)<br><b><math>\pm 0.7</math></b>  | 1.6<br>(11)<br>$\pm 0.4$                           | 4.7<br>(12)<br>$\pm 0.7$  | n/d                      | 7.1<br>(5)<br>$\pm 2.2$ | 3.0<br>(12)<br>$\pm 0.0$ | 2.9<br>(5)<br>$\pm 1.5$ | 5.9<br>(5)<br>$\pm 3.6$ | n/d        | n/d                      |
|                            |              | PI             | 1.7<br>(8)<br>$\pm 0.2$                            | 5.0<br>(8)<br>$\pm 2.0$                            | 0.7<br>(12)<br>$\pm 0.7$  | n/d                      | 2.2<br>(7)<br>$\pm 1.2$ | 7.3<br>(6)<br>$\pm 2.5$  | 1.3<br>(1)              | 1.5<br>(2)              | n/d        | n/d                      |
|                            | sad9         | Anti-AsMT1     | 1.5<br>(7)<br>$\pm 0.4$                            | 2.3<br>(4)<br>$\pm 1.1$                            | 2.0<br>(6)<br>$\pm 0.8$   | n/d                      | 3.6<br>(1)              | 0.3<br>(4)<br>$\pm 0.3$  | 1.3<br>(1)              | n/d                     | n/d        | n/d                      |
| <i>N. benthamiana</i> leaf | CPMV-AsMT1   | Anti-AsMT1     | <b>29.1</b><br>(15)<br><b><math>\pm 2.4</math></b> | 2.6<br>(15)<br>$\pm 0.3$                           | 3.6<br>(13)<br>$\pm 0.8$  | 6.6<br>(9)<br>$\pm 1.1$  | n/d                     | 1.1<br>(15)<br>$\pm 0.5$ | 6.9<br>(1)              | n/d                     | 0.0<br>(1) | 2.5<br>(15)<br>$\pm 0.5$ |
|                            |              | PI             | 1.0<br>(8)<br>$\pm 0.1$                            | 1.0<br>(8)<br>$\pm 0.2$                            | 0.4<br>(5)<br>$\pm 0.2$   | 0.7<br>(2)<br>$\pm 0.7$  | n/d                     | 1.0<br>(8)<br>$\pm 0.5$  | n/d                     | n/d                     | n/d        | 0.7<br>(4)<br>$\pm 0.6$  |
|                            | CPMV-EV      | Anti-AsMT1     | 1.5<br>(5)<br>$\pm 0.4$                            | 1.7<br>(5)<br>$\pm 0.1$                            | 7.4<br>(3)<br>$\pm 2.9$   | 6.1<br>(1)               | n/d                     | 0.4<br>(3)<br>$\pm 0.4$  | n/d                     | n/d                     | n/d        | 0.5<br>(2)               |
|                            |              |                | <b>AsUGT74H5 (SAD10)</b>                           |                                                    |                           |                          |                         |                          |                         |                         |            |                          |
| Oat root tip               | WT           | Anti-AsUGT74H5 | <b>10.8</b><br>(12)<br><b><math>\pm 0.4</math></b> | 12.8<br>(11)<br>$\pm 1.0$                          | 3.1<br>(10)<br>$\pm 0.7$  | 0.0<br>(1)               | 5.9<br>(1)<br>$\pm 1.2$ | 2.6<br>(10)<br>$\pm 0.8$ | 8.5<br>(4)<br>$\pm 4.6$ | 4.6<br>(3)              | n/d        | n/d                      |
|                            |              | PI             | 1.7<br>(10)<br>$\pm 0.1$                           | 1.5<br>(9)<br>$\pm 0.4$                            | 1.4<br>(10)<br>$\pm 0.4$  | n/d                      | 1.6<br>(8)<br>$\pm 0.5$ | 2.0<br>(9)<br>$\pm 0.7$  | 0.5<br>(2)<br>$\pm 0.7$ | 0.0<br>(1)              | n/d        | n/d                      |
| <i>N. benthamiana</i> leaf | CPMV-UGT74H5 | Anti-AsUGT74H5 | <b>74.8</b><br>(10)<br><b><math>\pm 0.1</math></b> | 2.8<br>(12)<br>$\pm 0.4$                           | 11.6<br>(10)<br>$\pm 3.5$ | 6.3<br>(10)<br>$\pm 1.4$ | n/d                     | 10.5<br>(6)<br>$\pm 6.0$ | n/d                     | n/d                     | n/d        | 1.5<br>(3)<br>$\pm 0.8$  |
|                            |              | PI             | 8.1<br>(8)<br>$\pm 1.2$                            | 2.4<br>(8)<br>$\pm 0.5$                            | 16.2<br>(4)<br>$\pm 3.0$  | 13.0<br>(3)<br>$\pm 4.9$ | n/d                     | 5.5<br>(8)<br>$\pm 2.8$  | n/d                     | n/d                     | 0.0<br>(1) | n/d                      |
|                            | CPMV-EV      | Anti-AsUGT74H5 | 2.0<br>(10)<br>$\pm 0.3$                           | 1.8<br>(8)<br>$\pm 0.5$                            | 3.5<br>(6)<br>$\pm 1.4$   | 1.7<br>(6)<br>$\pm 0.7$  | n/d                     | 1.2<br>(8)<br>$\pm 0.6$  | 1.8<br>(2)<br>$\pm 1.8$ | n/d                     | 0.0<br>(1) | n/d                      |

Density (particles per  $\mu\text{m}^2$ ) of gold particles in different subcellular compartments across replicate ultrathin tissue sections, from oat root tips or from *N. benthamiana* leaves, probed with anti-sera raised against the As- MT1, As- UGT74H5 or the As- SCPL1 proteins, or their corresponding pre-immune (PI) anti-sera. Values are mean particle densities measured across (n) replicate samples  $\pm$  SEM. Values in bold indicate a compartment with significantly denser labelling in samples relative to the corresponding pre-immune sera experiment, and the corresponding mutant (where available) or empty vector control experiment ( $p < 0.05$ , multiple linear regression). Cyt, cytoplasm; Vac, vacuole; Mit, mitochondria; Pla, plastid; ER, endoplasmic reticulum; Wall, cell wall; Nuc, nucleus; Gol, golgi; Oth, other; Int, intercellular space.

### Supplemental References

**Mugford, S.T., Qi, X., Bakht, S., Hill, L., Wegel, E., Hughes, R.K., Papadopoulou, K., Melton, R., Philo, M., Sainsbury, F., Lomonossoff, G.P., Deb Roy, A., Goss, R.J.M. and Osbourn, A. (2009).** A serine carboxypeptidase-like acyltransferase is required for synthesis of antimicrobial compounds and disease resistance in oats. *Plant Cell* **21**: 2473-84.

**Qi, X., Bakht, S., Qin, B., Leggett, M., Hemmings, A., Mellon, F., Eagles, J., Werck-Reichhart, D., Schaller, H., Lesot, A., Melton, R., and Osbourn, A. (2006).** A different function for a member of an ancient and highly conserved cytochrome P450 family: from essential sterols to plant defense. *Proc. Natl. Acad. Sci. USA* **103**: 18848-18853.

**Tsurushima, T., Ueno, T., Fukami, H., Irie, H., and Inoue, M. (1995)** Germination self-inhibitors from *Colletotrichum gloeosporioides* f. sp. *Jussiaea*. *MPMI* **8**: 652-657.
